# Supplementary material for: Candidate Gene Analysis Reveals That the Fruit Color Locus C1 Corresponds to PRR2 in Pepper (Capsicum frutescens)
Source: PubMed Central journal article supplement (PMC7161348; doi:10.3389/fpls.2020.00399), 2020-04-09
Supplement: Data_Sheet_2.pdf [file Data_Sheet_2.pdf]

27 bp insertion in coding seq. in grey box

9 aa insertion in amino acid seq. in blue box

SNP leading to stop codon in red box

Translation termination in yellow box

**>AC08-045 *PRR2* coding seq.**

```
ATGATTTGCATTGAGGATGAATTATTGGGTTGGAAAGATTTCCCAAAGGGGCTTAAAGTCCTGCTCCTTGATGAAGATAGCAACTCTGCTGCTGAGATGAAATCAAGGCTTGAG
AAAATGGACTATATAGTCTACACGTTCTGCAATGAGAGTGAAGCTTTGTCTGCAATCTCTAGCAAATCCGAGGGCTTTCATGTTGCCATTGTGGAGGTAAGTGCAGGCGATAATG
ATGGGGTCTCCAATTTCTTGAAAGTGCCAAAAATCTACCAACTATAATGACATCAAATATTCATTCTCTCAGCACAATGATGAAGTGATTGCGCTTGGTGCAGTTGAGTTCCTT
CAGAAACCATTATCAGATGACAACTCAAAAATATATGGCAGCATGTAGTTCACAAGGCATTCAATGCTAGAAAGGATGTGTCCGGACCACTTGAGCCGGTAAAAGAATCTCTT
CTTTCGATGCTACAGCTACAACCAGAAAAGGGTGAACCAGATGACAAAAGTTCAAATGGAACAGAACCTCTCATTGCAGTTGCGGACAACAATACCGAACAGTCATCAGGCT
GTGATAAATACCCTGCTCCCTCAACCCCTCAATTGAAACAAGGAGTGCGGTCAGTGGATGATAGTGACTGCCATGATCATACTATCTTCTCAACTGACCAAGACAGTGGGGAGC
ATGATGGTGACACTAAATCCGTCGAACTACTTATAACAATCACTTGCTGAGAATACTGTCCAAATAAGTCCTCCTGGGCAACAAGAAGATATAATTTTGAAAGAGGAGAATG
GTTTCATCTCCTCATCAAATATGGAGGCTGATATTGCTACCTTTTCACAAATTAATGACTGCGCTGACAATAGTGATGGTTCATCTCCTCATCAAAGACGGAGGCTGATATTGCT
ACTACCTTTCACAAAGTAAAGACTGCCCTGACAATAGCATTAGTCATTCTGCTGAACCTAGTAAAGCTTCTGGTCCCCATAGCTCAAGTGGGACTAAATCCAATAAGAAAAAG
GTGAAGGTAGATTGGACACCTGAACTACACAAAAAGTTTGTTC AAGCAGTAGAGCAACTTGGTATAGATCAAGCCATTCCTTCTCGAATACTAGACGTGATGAAAGTGGAGGG
CTTAACGAGACATAACATAGCTAGCCATCTCCAGAAATACAGAATGCATCGGAGGCAAATTTTGCCAAGGGAAGTGGAAAGGAGATGGCCCCATCCGCAACCTAGAGATTCA
GTACAAAGGAATTACTATCCTCATAAACCTGTCATGACATTCCCACCATATCATTCTAATCATGTCGCCCCAGCTGGTCAATGTTATCCTGCTTGGGTACCACCGGCTAGTTATCCG
AATGGTTTACAAGTGTGGGGTTCACCTTACTATCCGGGATGGCAGCCTGCAGAGACTTGGCACTGGAAGCCTCATCCAGGGCTGCTTGCTGATACATGGGGCTCCCCTGTCAT
GCCACCATCGTTTGGATCGTATCCACCATATCCCCAGAATGCTGGAATGTACCAGTCTCACGGAATGCATAACAGATATAGCATGCTAGAGAAGTCATTTCGATGTTACCCGGCA
GAGGAGGTGATTGATAAAGTAGTAAAGGAGGCAATAACCAAACCATGGTTACCACTTCCTTTGGGCTTAAACCTCCTTCCATGGAGGGTGTACTCGACGAGCTTTCTAGACA
AGGAATCTCAACCGTCCCTCCACGAATCAATGGCTCTCGATGTTGGAGATGA
```

>AC08-201 *PRR2* coding seq.

ATGATTTGCATTGAGGATGAATTATTGGGTTGGAAAGATTTCCCAAAGGGGCTTAAAGTCCTGCTCCTTGATGAAGATAGCAACTCTGCTGCTGAGATGAAATCAAGGCTTGAG  
AAAATGGACTATATAGTCTACACGTTCTGCAATGAGAGTGAAGCTTTGTCTGCAATCTCTAGCAAATCCGAGGGCTTTCATGTTGCCATTGTGGAGGTAAGTGCAGGTGATAATG  
ATGGTGCCTCCAATTTCTTGAAAGTGCCAAAAATCTACCAACTATAATGACATCAAATATTCATTCTCTCAGCACAATGATGAAGTGTATTGCGCTTGGTGCAGTTGAGTTCCTTC  
AGAAACCATTATCAGATGACAACTCAAAAATATATGGCAGCATGTAGTTCACAAGGCTTTC AATGCTAGAAAGGATGTGTCCGGACCACTTGAGCCGGTAAAAGAATCTCTTC  
TTTCGATGCTACAGCTACAACCAGAAAAGGGTGAACCAGATGACAAAAGTTCAAATGGAACAGAACCTCTCATTGCAGTTGCGGACAACAATACCGAACAGTCATCGGGCTG  
TGATAAATACCCTGCTCCCTCAACCCCTCAATTGAAACAAGGAGTGCGGTCAGTGGATGATAGTACTGACTGCCATGATCATACTATCTTCTCAGCTGACCAAGACAGTGGGGAGCA  
TGATGGTGACACTAAATCCGTGCGAACTACTTATAACAATCACTTGCTGAGAATACTGTCCAAATAAGTCCTCCTGGGCAACAAGAAGATATAATTTTGAAAGAGGAGAATGGT  
TCATCTCCTCATCAAACCTATGGAGGCTGATATTGCTACCTTTTCACAAATTAATGACTGCGCTGACAATAGTGATGGTTCATCTCCTCATCAAAGACGGAGGCTGATATTGCTAC  
TACCTCTTCA **T**AAAGTAAAGACTGCCCTGACAATAGCATTAGTCATTCTGCTGAACCTAGTAAAGCTTCTGGTCCCATAGCTCAAGTGGGACTAAATCCAATAAGAAAAAGGT  
GAAGGTAGATTGGACACCTGAACTACACAAAAAGTTTGTTC AAGCAGTAGAGCAACTTGGTATAGATCAAGCCATTCTTCTCGAATACTAGACGTGATGAAAGTGGAGGGCT  
TAACGAGACATAACATAGCTAGCCATCTCCAGAAATACAGAATGCATCGGAGGCAAATTTTGCCAAGGGAAGTGGAAAGGAGATGGCCCCATCCGCAACCTAGAGATTCAAGT  
ACAAAGGAATTACTATCCTCATAAACCTGTCATGACATTCCCACCATATCATTCTAATCATGTCGCCCCAGCTGGTCAATGTTATCCTGCTTGGGTACCACCGGCTAGTTATCCGAA  
TGGTTTACAAGTGTGGGGTTCACCTTACTATCCGGGATGGCAGCCTGCAGAGACTTGGCACTGGAAGCCTCATCCAGGGCTGCTTGCTGATACATGGGGCTCCCTGTCATGC  
CACCATCGTTTGGATCGTATCCACCATATCCCCAGAATGCTGGAATGTACCAGTCTCACGGAATGCATAACAGATATAGCATGCTAGAGAAGTCATTTCGATGTTACCCGGCAGA  
GGAGGTGATTGATAAAGTAGTAAAGGAGGCAATAACCAAACCATGGTTACCACTTCCTTTGGGCTTAAAACCTCCTTCCATGGAGGGTGTACTCGACGAGCTTTCTAGACAAG  
GAATCTCAACCGTCCCTCCACGAATCAATGGCTCTCGATGTTGGAGATGA

**>AC08-045\_Amino acid seq.**

MICIEDELLGWKDFPKGLKVLVLLDEDSNSAAEMKSRLEKMDYIVYTFCNESEALSAISSKSEGFHVAIVEVSAGDNDGVLQFLES AKNLPTIMTSNIHSLSTMMKCIALGAVEFLQKPL  
SDDKLKNIWQHVVHKAFNARKDVSGPLEPVKESLLSMLQLQPEKGEPDDKSSNGTEPLIAVADNNTQSSGCDKYPAPSTPQLKQGVRVDDSDCHDHTIFSTDQDSGEHDGD  
TKSVETTYNNSLAENTVQISPPGQQEDIILKEENGSSPHQTMEADIATFSQINDCADNSDGSSPHQKTEADIATTSSQSKDCPDNSISHSAEPSKASGPHSSSGTKSNKKKVKVDW  
TPELHKKFVQAVEQLGIDQAIPSRILDVMKVEGLTRHNIASHLQKYRMHRRQILPREVERRWPHPQPRDSVQRNYYPHKPVMTFPPYHSNHVAPAGQCYPAWVPPASYPNGLQV  
WGSPYYPGWQPAETWHWKPHPGLLADTWGSPVMPPSFGSYPPYPQNAGMYQSHGMHNRYSMLEKSFVHPAEEVIDKVVKEAITKPWLPLPLGLKPPSMEGVLDELSRQGIS  
TVPPRINGSRCWR-

**>AC08-201\_Amino acid seq.**

MICIEDELLGWKDFPKGLKVLVLLDEDSNSAAEMKSRLEKMDYIVYTFCNESEALSAISSKSEGFHVAIVEVSAGDNDGVLQFLES AKNLPTIMTSNIHSLSTMMKCIALGAVEFLQKPL  
SDDKLKNIWQHVVHKAFNARKDVSGPLEPVKESLLSMLQLQPEKGEPDDKSSNGTEPLIAVADNNTQSSGCDKYPAPSTPQLKQGVRVDDSDCHDHTIFSADQDSGEHDGD  
TKSVETTYNNSLAENTVQISPPGQQEDIILKEENGSSPHQTMEADIATFSQINDCADNSDGSSPHQKTEADIATTSS\*SKDCPDNSISHSAEPSKASGPHSSSGTKSNKKKVKVDW  
TPELHKKFVQAVEQLGIDQAIPSRILDVMKVEGLTRHNIASHLQKYRMHRRQILPREVERRWPHPQPRDSVQRNYYPHKPVMTFPPYHSNHVAPAGQCYPAWVPPASYPNGLQV  
WGSPYYPGWQPAETWHWKPHPGLLADTWGSPVMPPSFGSYPPYPQNAGMYQSHGMHNRYSMLEKSFVHPAEEVIDKVVKEAITKPWLPLPLGLKPPSMEGVLDELSRQGIS  
TVPPRINGSRCWR-
