# Supplementary material for: Candidate Gene Analysis Reveals That the Fruit Color Locus C1 Corresponds to PRR2 in Pepper (Capsicum frutescens)
Source: PubMed Central journal article supplement (PMC7161348; doi:10.3389/fpls.2020.00399), 2020-04-09
Supplement: Presentation_1.pdf [file Presentation_1.pdf]

**Supplementary table****Table S1.** Carotenoid profiles of each accession.

| Accession | Lutein              | Neoxanthin          | Antheraxanthin      | Zeaxanthin          | Total carotenoids<br>(mg/100 g dW) |
|-----------|---------------------|---------------------|---------------------|---------------------|------------------------------------|
| AC08-045  | 5.32±0.88<br>(0.88) | 0.65±0.09<br>(0.11) | 0.00±0.00<br>(0.00) | 0.11±0.00<br>(0.02) | 6.07±0.97                          |
| AC08-201  | 0.71±0.07<br>(0.70) | 0.19±0.01<br>(0.19) | 0.14±0.02<br>(0.14) | 0.00±0.00<br>(0.00) | 1.02±0.08                          |

Supplementary figures

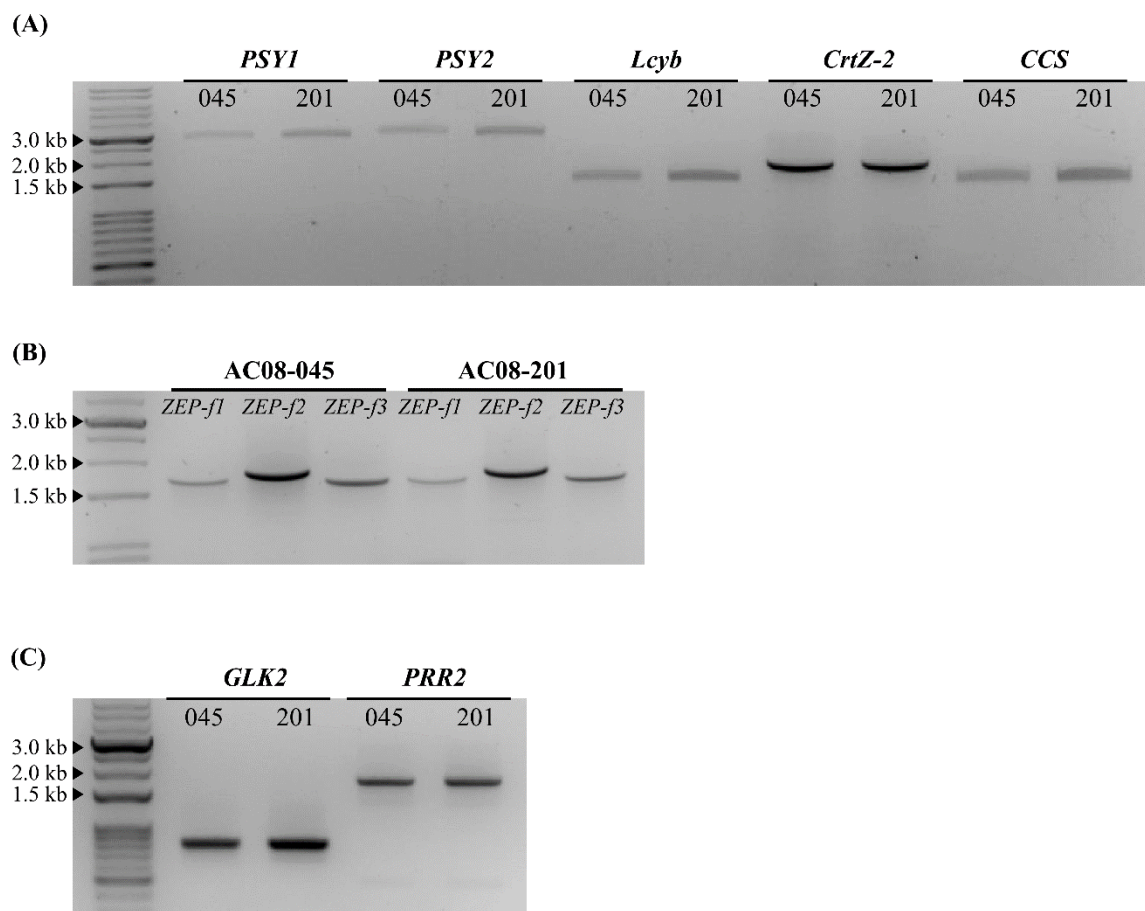

**Fig. S1.** PCR results of six carotenoid biosynthesis genes using gDNA and two plastid regulating genes using cDNA from AC08-045 and AC08-201.

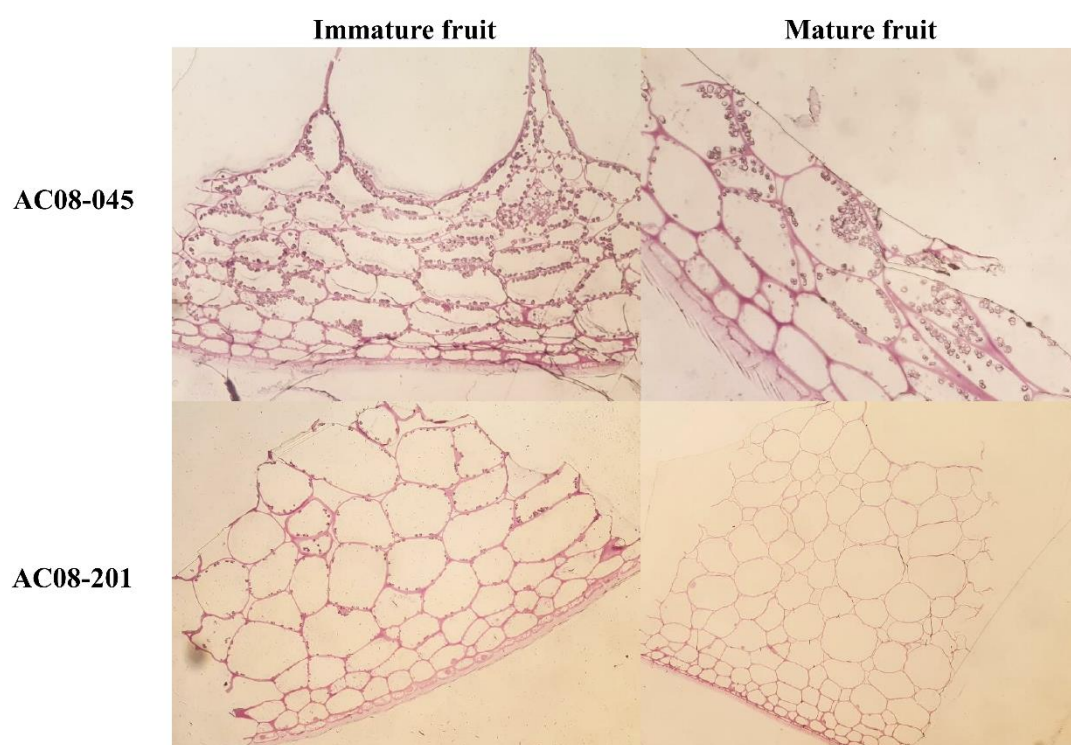

**Fig. S2.** Microscopic images of immature and mature fruit pericarps of AC08-045 and AC08-201 stained with toluidine blue.

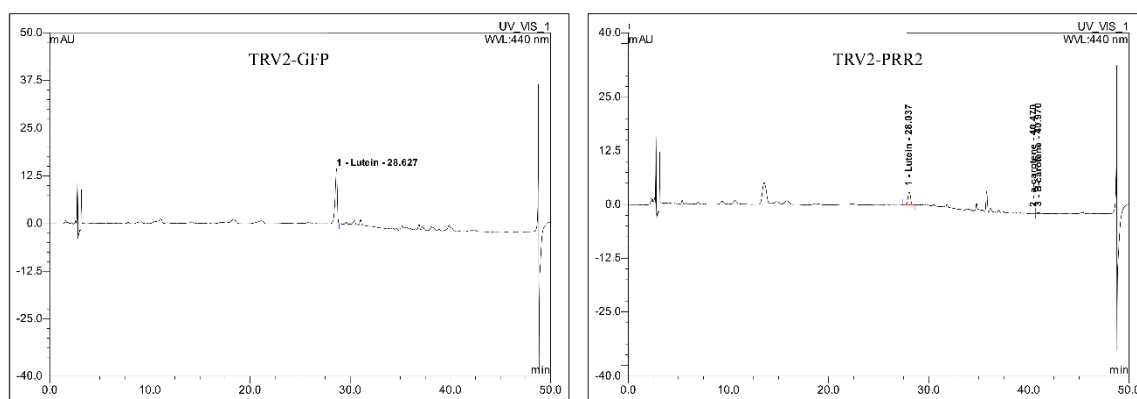

**Fig. S3.** HPLC profile of the mature fruits from MY plants subjected to VIGS.

**Supplementary Materials**

**Supplementary Material 1.** Alignment of coding sequence of *PSY1*, *CCS*, and *GLK2* between AC08 and CM334. (excel file)

**Supplementary Material 2.** Coding sequence and amino acid sequence of *PRR2* of AC08-045 and AC08-201. (pdf file)
